# Supplementary material for: A pH/ROS dual-responsive nanoparticle system for tumor targeting combined chemotherapy/phototherapy
Source: Royal Society of Chemistry journal article supplement (doi:10.1039/d2nj05078a), 2023-01-01
Supplement: d2nj05078a1.pdf [file d2nj05078a1.pdf]

Electronic Supplementary Material (ESI) for New Journal of Chemistry.

This journal is © The Royal Society of Chemistry and the Centre National de la Recherche Scientifique  
2022

**Electronic Supplementary Information (ESI)**

**A pH/ROS dual-responsive nanoparticles for tumor targeting  
combined chemotherapy/phototherapy**

Ying Luo, ‡<sup>a</sup> Yiyang Cong, ‡<sup>b</sup> Jia Liu, <sup>a</sup> Lihua Huang, <sup>a</sup> Wanting Cheng, <sup>a</sup> Peihu Xu, <sup>a</sup> Yihua Yin, <sup>a</sup> Hao Hong\*<sup>b</sup> and Wenjin Xu, \*<sup>a</sup>

<sup>a</sup> Department of Pharmaceutical Engineering, School of Chemistry, Chemical Engineering and Life Sciences, Wuhan University of Technology, 122 Luoshi Road, Wuhan, Hubei, 430070, China

<sup>b</sup> Medical School of Nanjing University, 22 Hankou Rd, Nanjing, Jiangsu 210093, China.

Email addresses: haohong@nju.edu.cn (H. Hong), chemxu@aliyun.com (W. Xu)

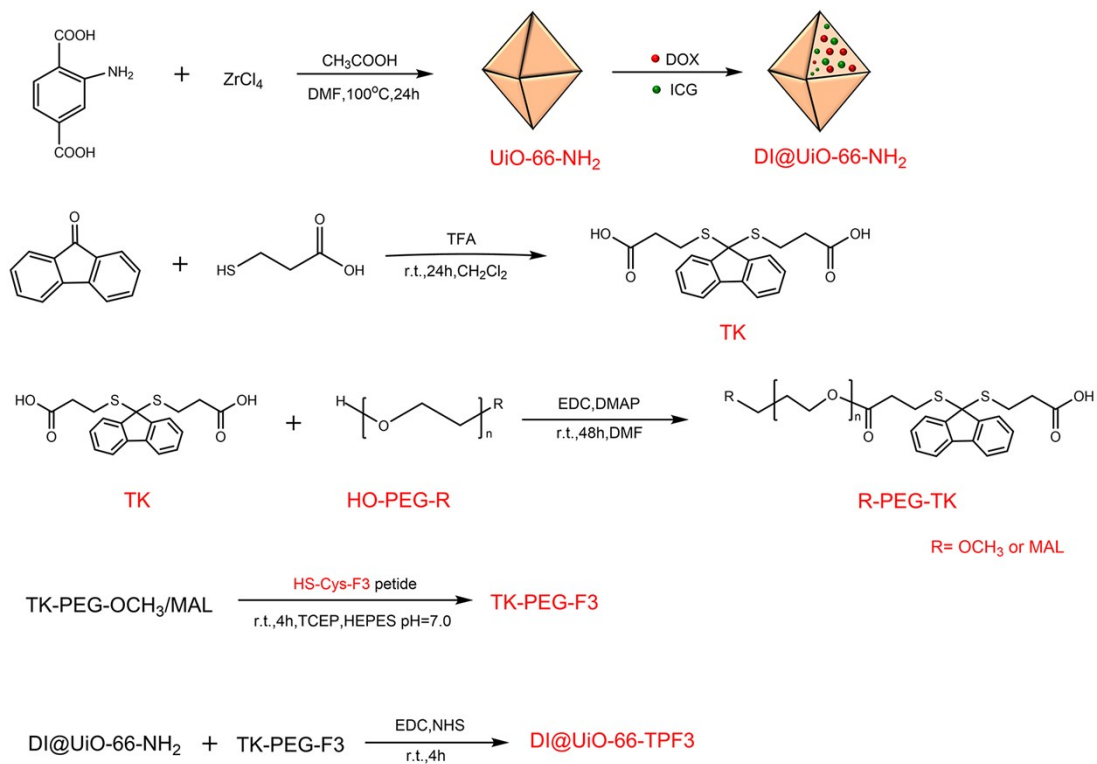

**Scheme S1.** Detailed Synthesis Process of DI@UiO-TPF3

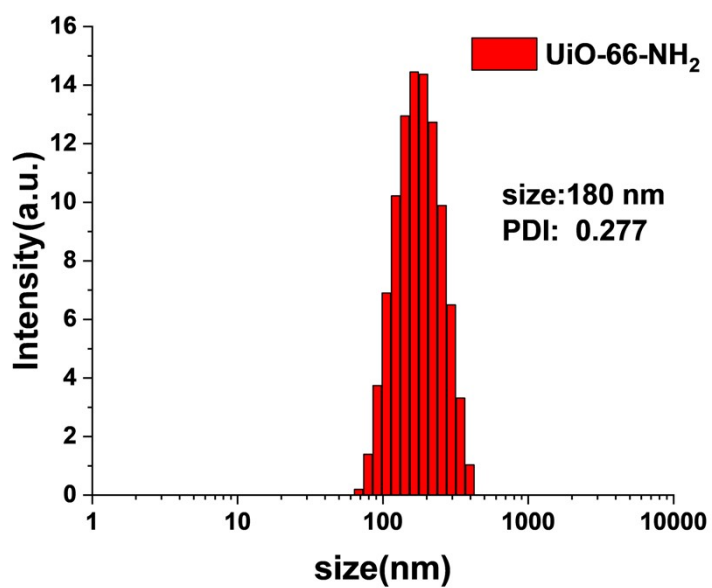

Figure S1. DLS measurement of UiO-66-NH<sub>2</sub>

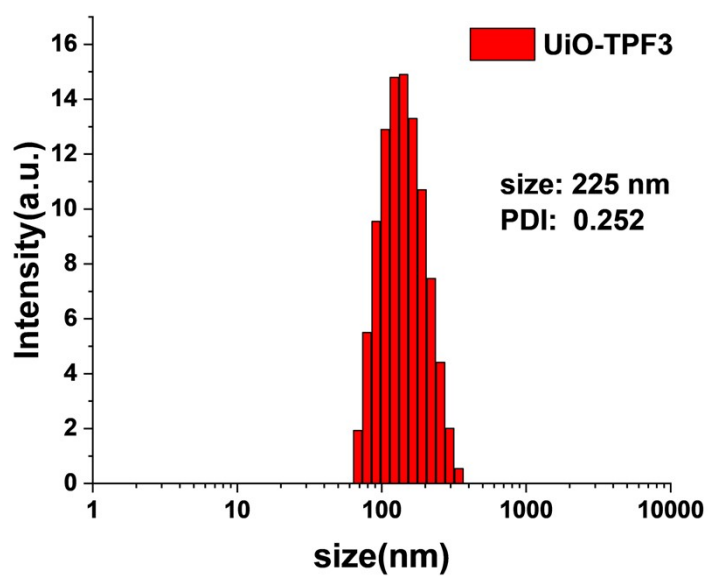

Figure S2. DLS measurement of UiO-TPF3

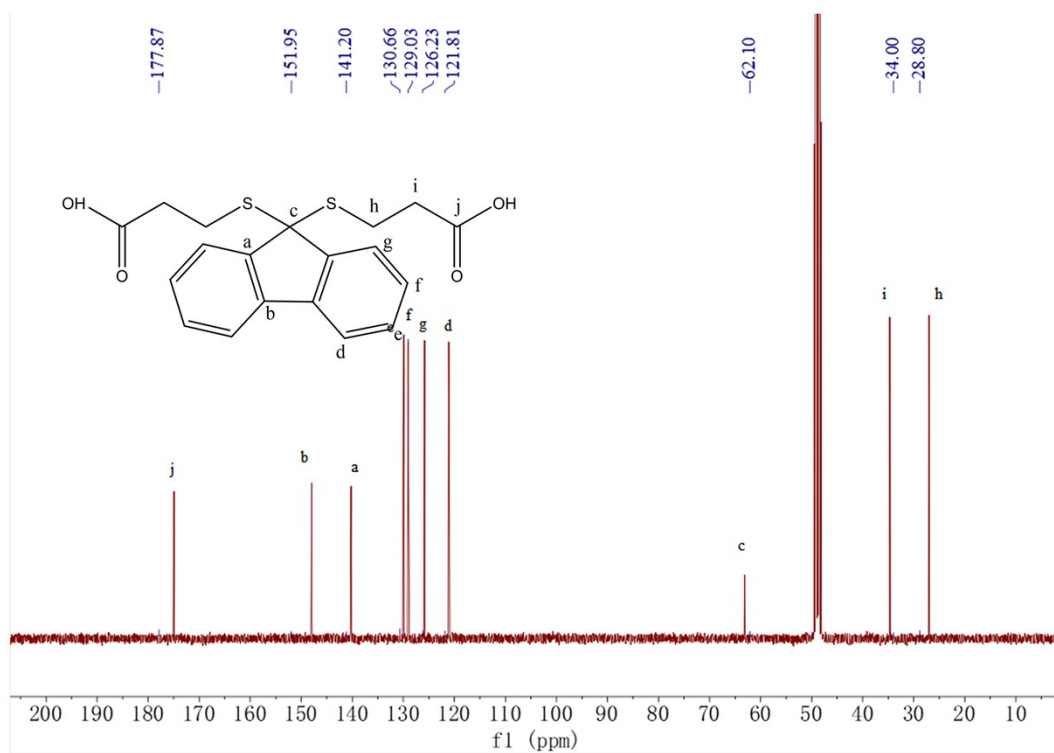

**Figure S3.** <sup>13</sup>C-NMR spectrum of TK

**Table S1.** BET and BJH parameters of UiO-66-NH<sub>2</sub>, UiO-TPF3, DI@UiO-TPF3.

| Sample                 | BET surface area         | BJH pore volume         | BJH pore diameter |
|------------------------|--------------------------|-------------------------|-------------------|
|                        | SBET (m <sup>2</sup> /g) | VP (cm <sup>3</sup> /g) | VBJH (nm)         |
| UiO-66-NH <sub>2</sub> | 834                      | 0.37                    | 3.3               |
| UiO-TPF3               | 170                      | 0.28                    | 2.5               |
| DI@UiO-TPF3            | 5.1                      | 0.006                   | /                 |
